# Supplementary material for: Single-cell dissection of Merkel cell carcinoma heterogeneity unveils transcriptomic plasticity and therapeutic vulnerabilities
Source: PubMed Central journal article supplement — Cell Rep Med. 2023 Jul 7;4(7):101101. doi: 10.1016/j.xcrm.2023.101101 (PMC10394170; doi:10.1016/j.xcrm.2023.101101), 2023-07-07
Supplement: mmc1.pdf [file mmc1.pdf]

**Cell Reports Medicine, Volume 4**

**Supplemental information**

**Single-cell dissection of Merkel cell carcinoma  
heterogeneity unveils transcriptomic plasticity  
and therapeutic vulnerabilities**

**Bhaba K. Das, Aarthi Kannan, Graham J. Velasco, Mikaela D. Kunika, Nils  
Lambrecht, Quy Nguyen, Haibo Zhao, Jie Wu, and Ling Gao**

## SUPPLEMENTAL INFORMATION

### Supplementary Items and Figures in This File.

**Figures S1, S2, S3, S4, S5, S6, S7**

**Table S1, S2, S5, and S7**

- Table S1** Summary of patient tumor samples and single cell RNA-seq analysis performed in this study. Related to STAR Methods, Figure 1, 2, and 3.
- Table S2** Cancer-associated fibroblast (CAF), MESI-19 and SIG-14 gene list used in this study. Related to STAR Methods and Figure 1 and 5.
- Table S5** MCC transcription factors identified by pySCENIC analysis. Related to STAR Methods.
- Table S7** TaqMan gene expression primers used for quantitative PCR analyses. Related to STAR Methods.

**Supplementary Spreadsheets.** (Provided separately in Excel format, due to size.)

**Table S3, S4, and S6**

- Table S3** List of differentially expressed genes used for generating heatmap. Related to Figure 1G.
- Table S4** Complete list of Hallmark Pathway enrichment. Related to Figure 1I, 2C, 6B, and 7B.
- Table S6** Master gene signature lists for epithelial-to-mesenchymal transition (EMT gene list) and mesenchymal markers (MES gene list). Related to STAR Methods.

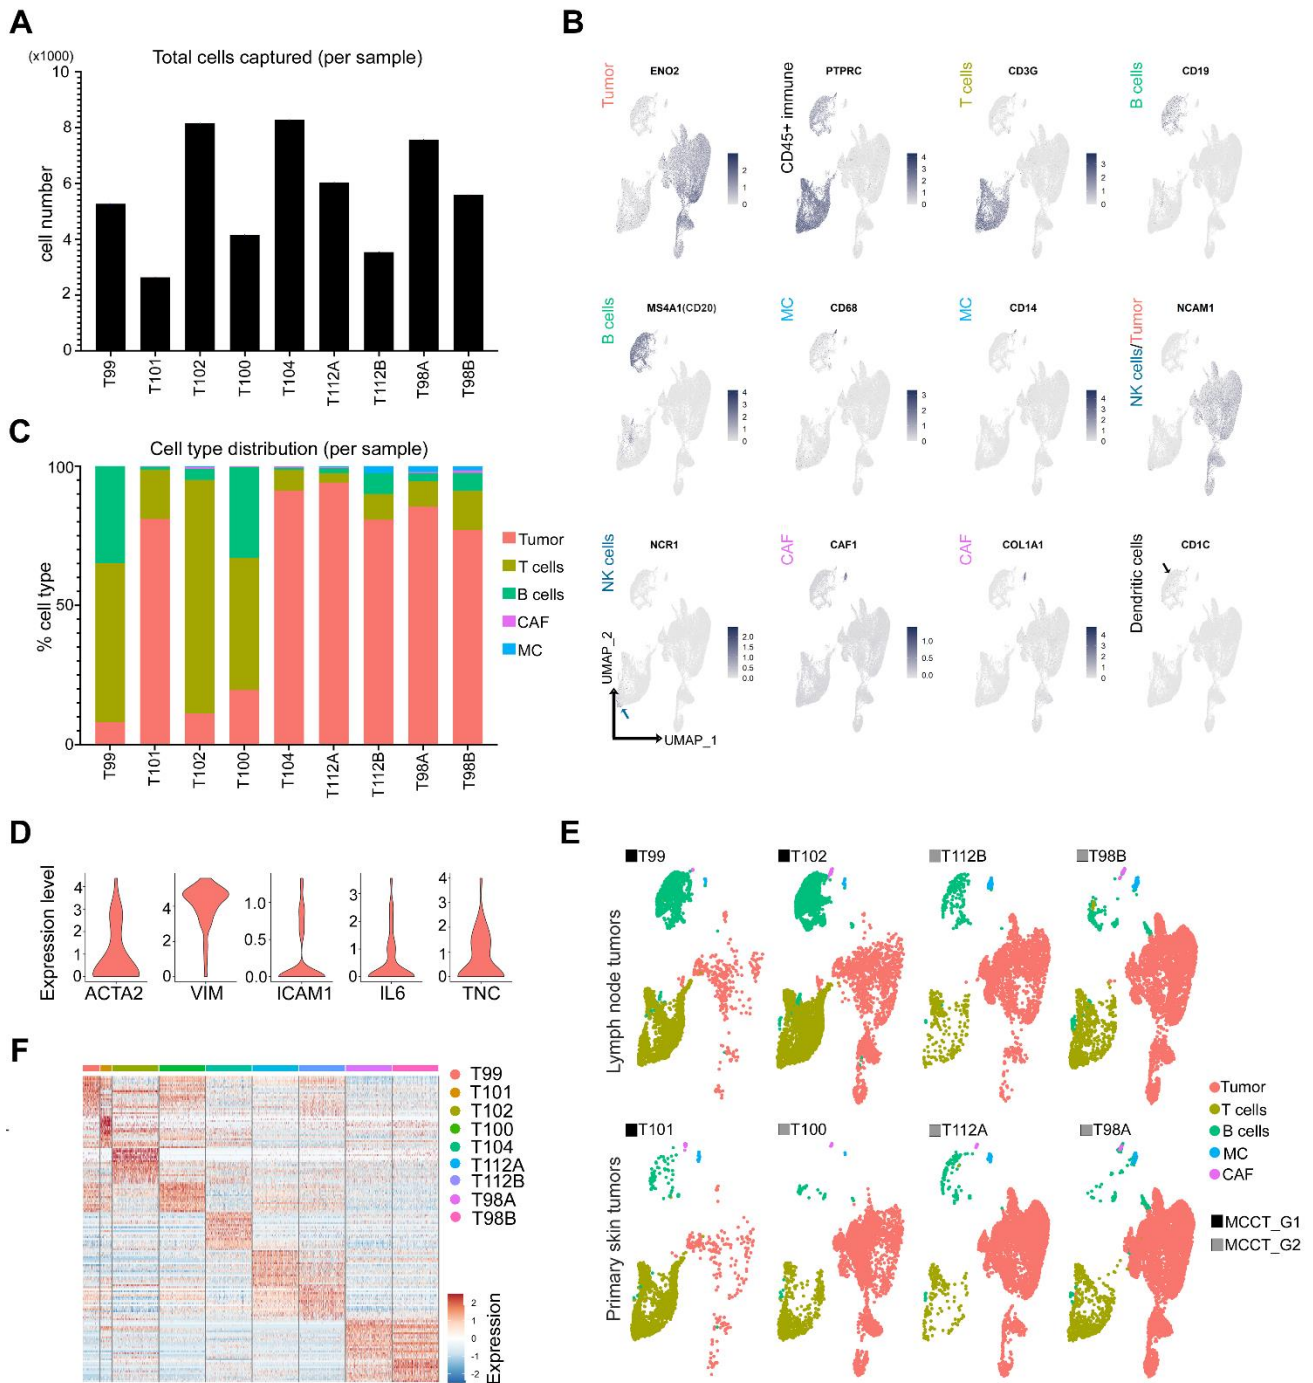

**Figure S1. scRNA-seq of treatment-naïve MCC tumors. Related to Figure 1 and Table 1. (A)** Total cells captured per sample. **(B)** Feature plots depicting distribution of select cell-type specific marker genes in UMAP clusters. MC: macrophages/monocytes; CAF: cancer-associated fibroblasts. **(C)** Percent composition of cell types across samples. **(D)** Violin plot of activation-associated marker gene expression in CAFs. **(E)** Split UMAP clusters of different cell types for lymph node and primary skin tumor samples. **(F)** Heatmap of top 20 variable genes across 500 randomly sampled tumor cells from each sample.

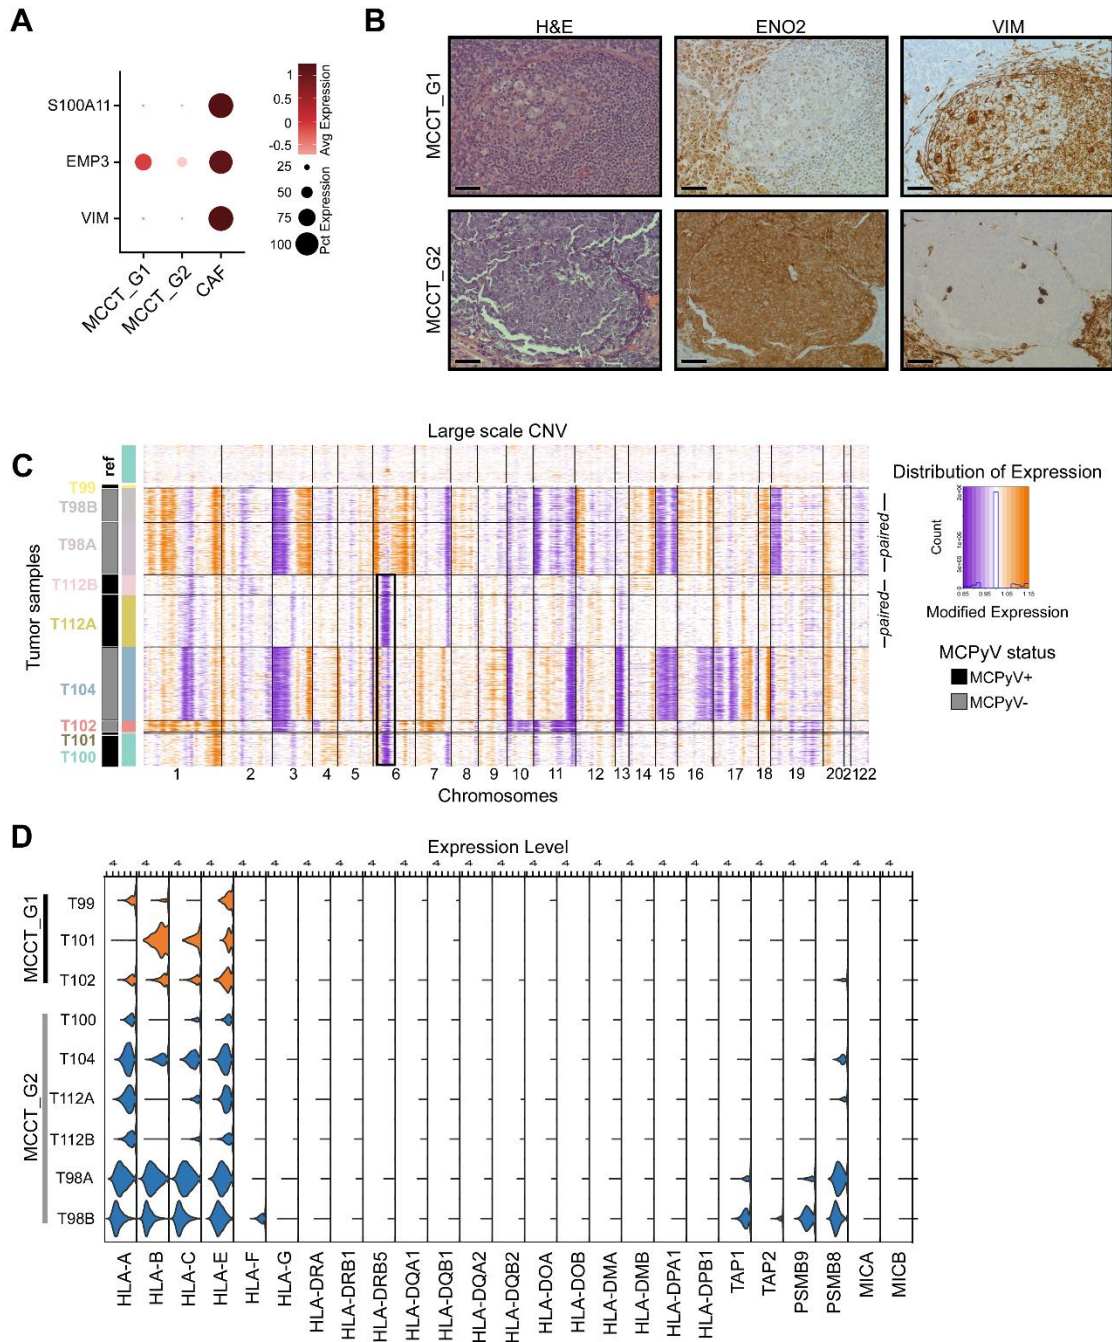

**Figure S2. Partial EMT, inferred CNV and HLA expression profile of MCC treatment-naïve tumors. Related to Figure 1. (A)** Scaled expression of selected mesenchymal markers across MCC tumor cells and CAFs depicting partial EMT in MCCT\_G1 tumors. **(B)** Representative brightfield images of H&E (left panels) and immunohistochemistry staining of ENO2 (middle panels) and VIM (right panels) on consecutive sections of MCCT\_G1 tumors (top row) and MCCT\_G2 tumors (bottom row), at magnification 200x, scale bar = 35  $\mu$ m. **(C)** Heatmap of inferred copy number variations (CNVs) normalized to the variations in CD3 T cell population demonstrating CNV by chromosome (columns) of individual cells (rows). **(D)** Violin plot depicting expression of MHC molecules in tumor cells across MCCT\_G1 and MCCT\_G2 tumors.

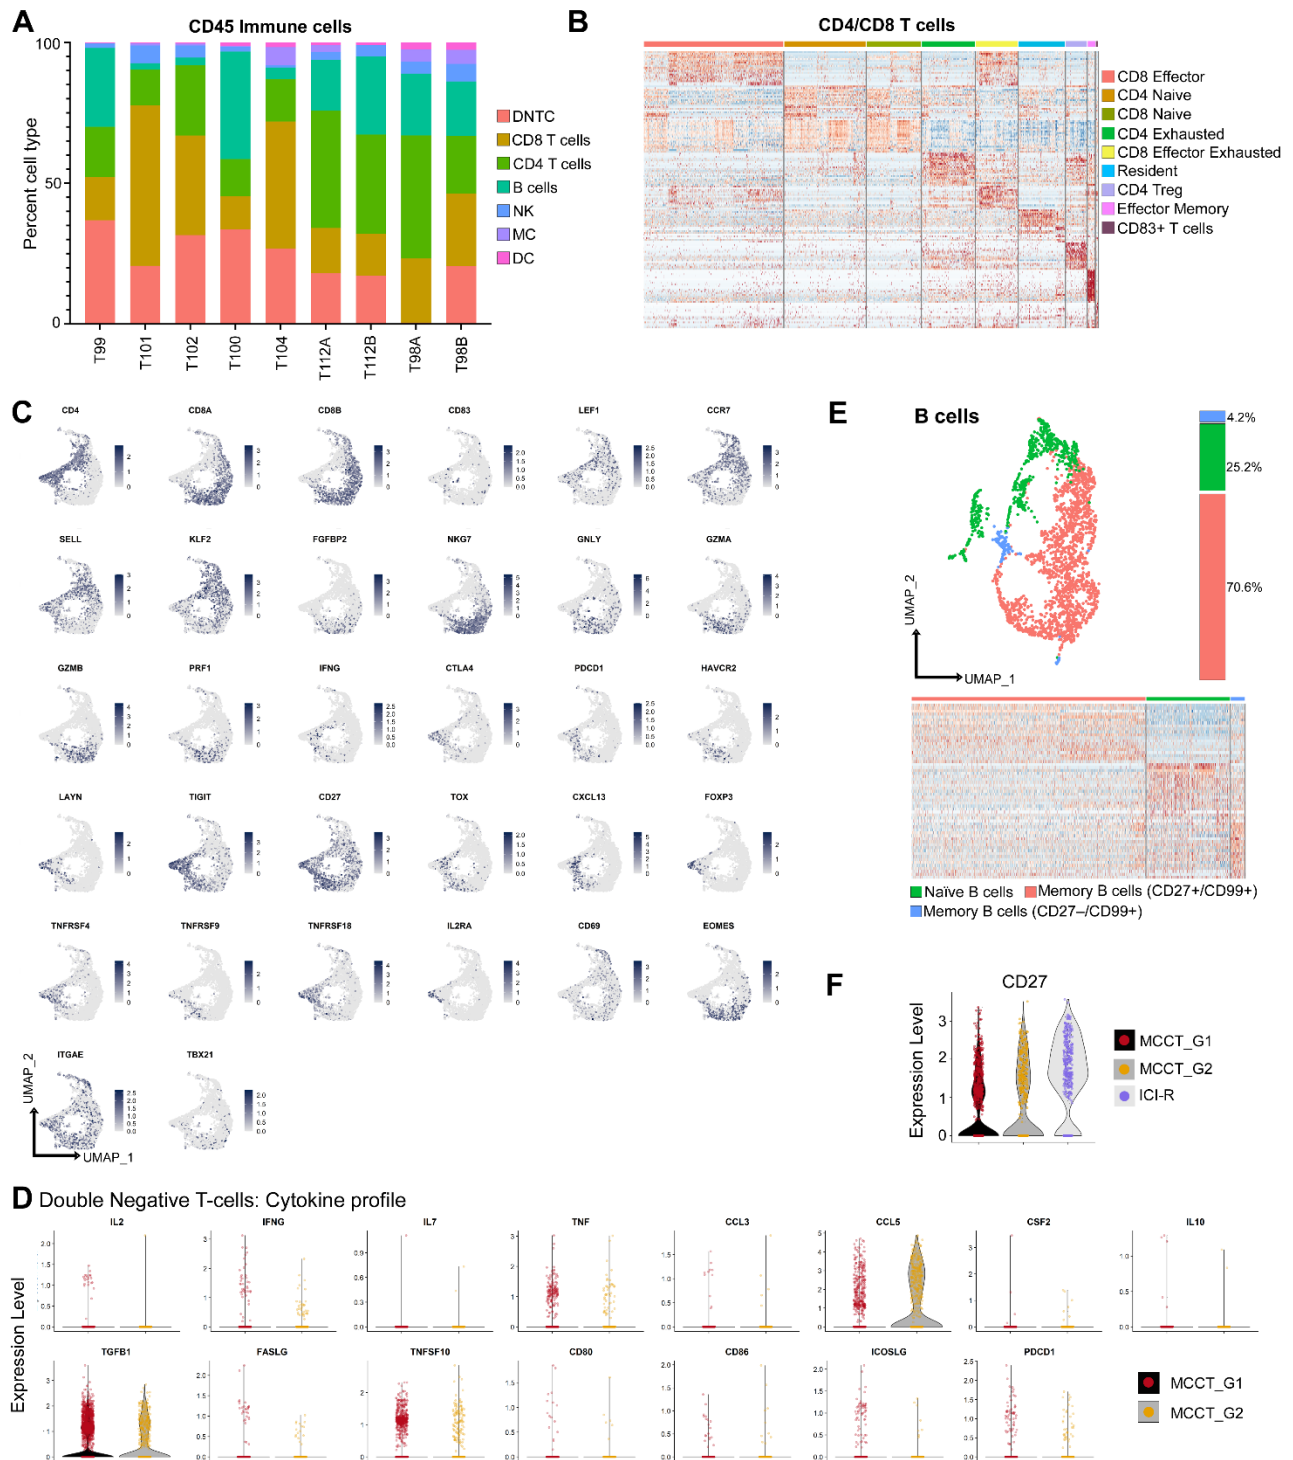

**Figure S3. Immune landscape of treatment-naïve MCC tumors. Related to Figure 3. (A)** Percentage distribution of CD45<sup>+</sup> immune cells in each tumor sample. **(B)** Heatmap of top 20 variable genes in CD4/CD8 T cell subtypes. **(C)** Feature plots depicting distribution of subtypes and marker genes of functional status in CD4/CD8 T cells. **(D)** Violin plots of select cytokines in DNTCs. **(E)** UMAP clusters for CD19<sup>+</sup>/CD20<sup>+</sup> B cells (*n* = 2,331 cells) with color-matched histogram and heatmap of top 20 variable genes across the three B cell subtypes. **(F)** Expression of CD27 in MCC tumor samples.

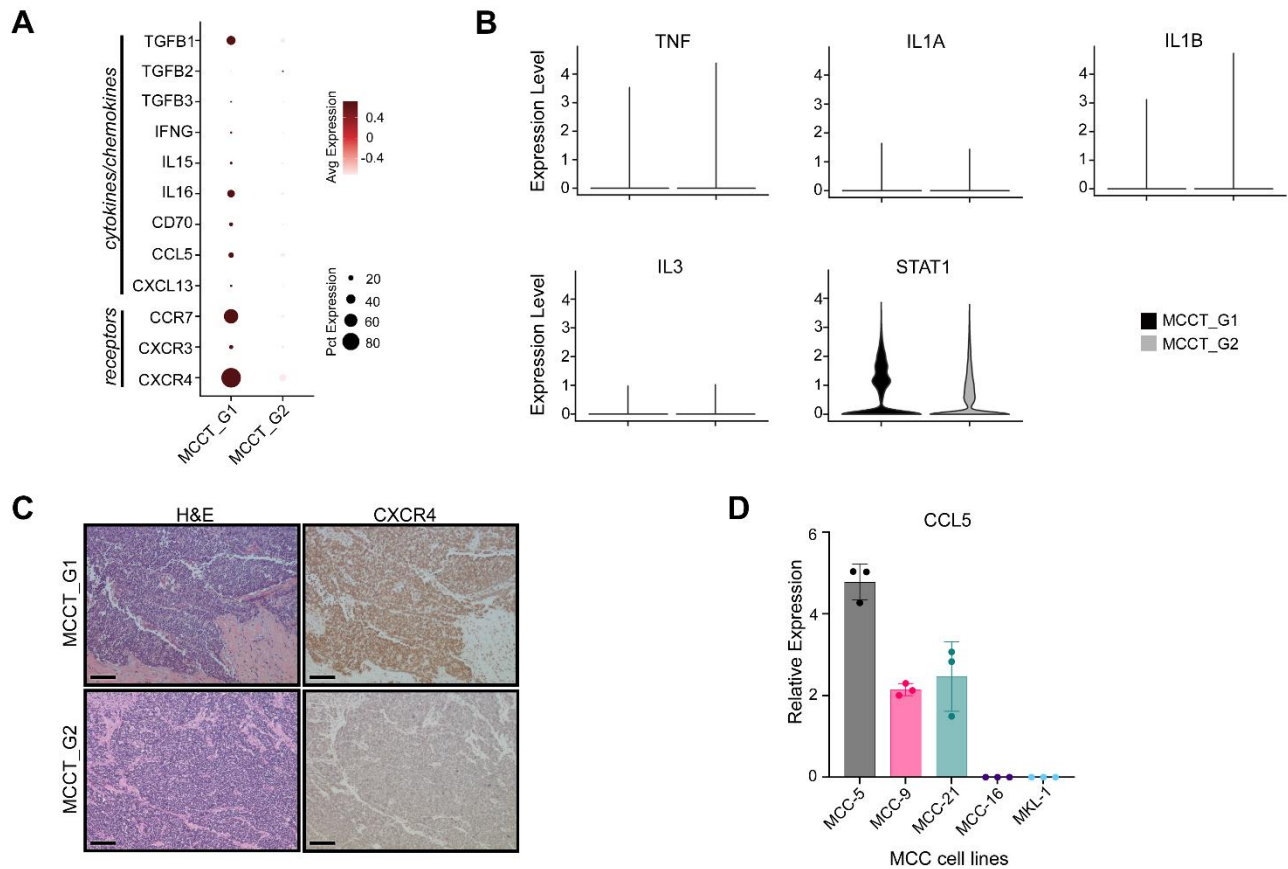

**Figure S4. The ‘mesenchymal-like’ state in MCC is endowed with inflamed phenotype. Related to Figure 3. (A)** Scaled expression of selected cytokines, chemokines, and chemokine receptors in MCCT\_G1 and MCCT\_G2 tumors. **(B)** Violin plots of classical inflammatory marker genes. **(C)** Representative brightfield images of H&E and CXCR4 immunohistochemistry staining in MCCT\_G1 and MCCT\_G2 tumors at 100x magnification, scale bar = 70  $\mu$ m. **(D)** CCL5 expression in five MCC patient-derived cell lines, as detected by qPCR and normalized to *MRPS2* (triplicate runs, mean  $\pm$  SD).

### A Outgoing signals from MCCT\_G1 cell types

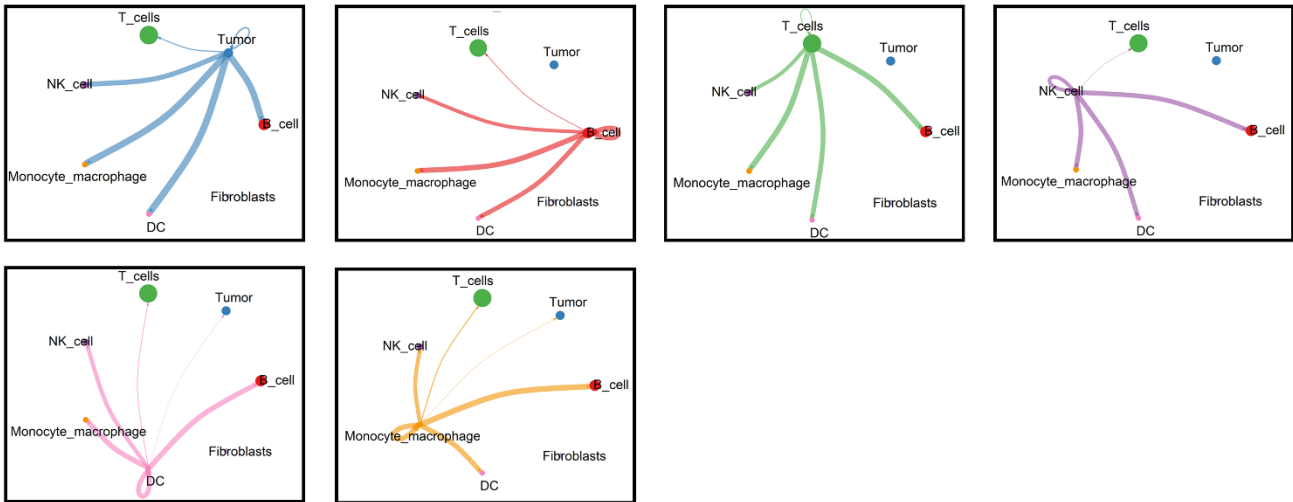

### B Outgoing signals from MCCT\_G2 cell types

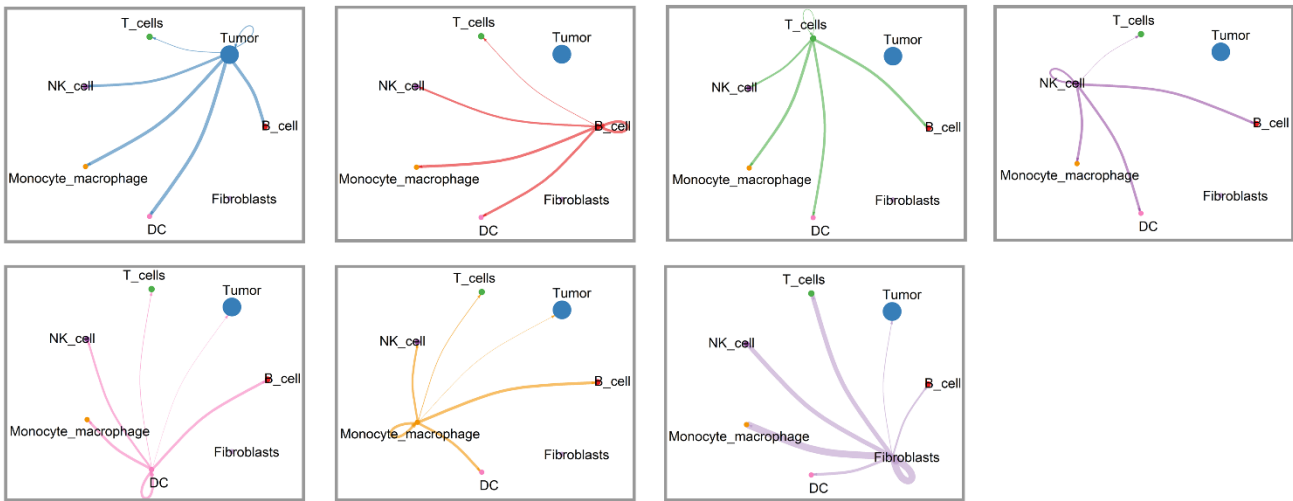

**Figure S5. Individual chord diagrams of signals arising from each cell type. Related to Figure 4. Outgoing signals from different cell types in (A) MCCT\_G1 and (B) MCCT\_G2 tumors with chord thickness/weight representing signal strength.**

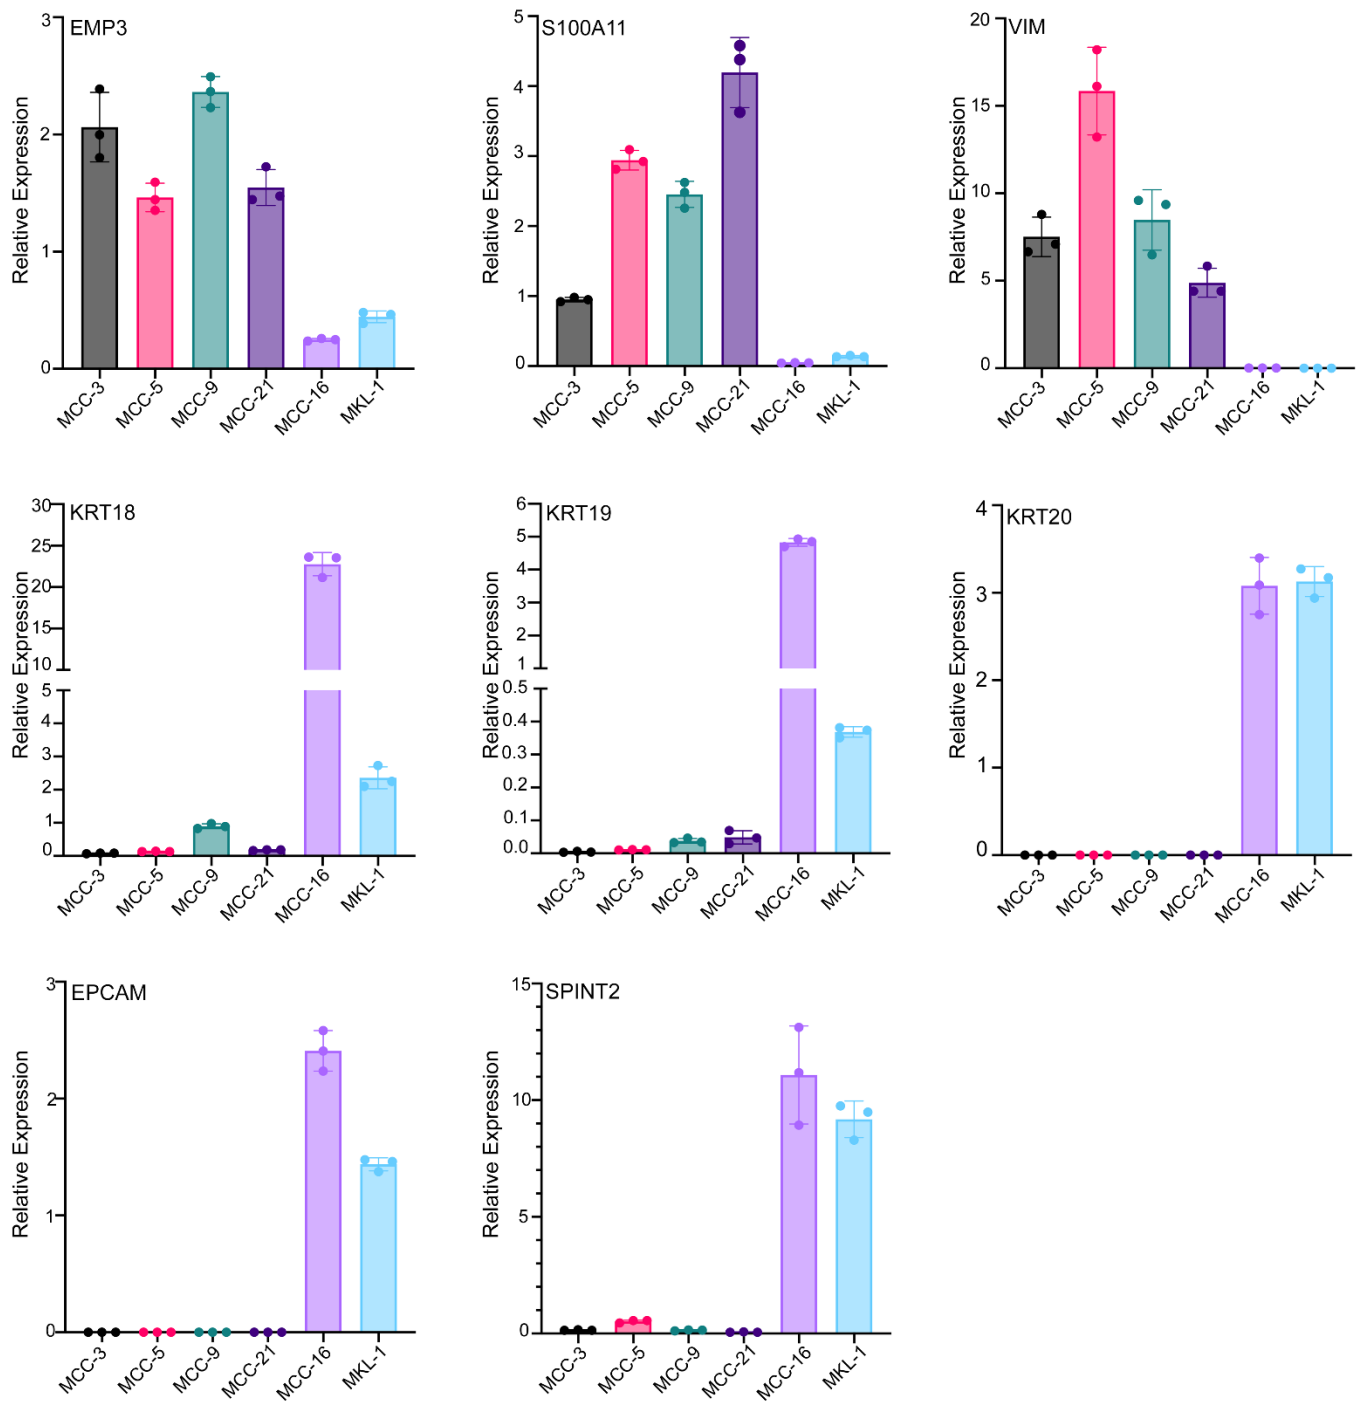

**Figure S6. Characterization of patient-derived MCC cell lines established in our laboratory.**

**Related to Figure 6.** mRNA expression of selected epithelial and mesenchymal markers in MCC\_G1 (MCC-3, MCC-5, MCC-9, MCC-21) and MCC\_G2 (MCC-16, MKL-1) cell lines, normalized to *MRPS2*. Data presented as mean ± SD,  $n = 3$ .



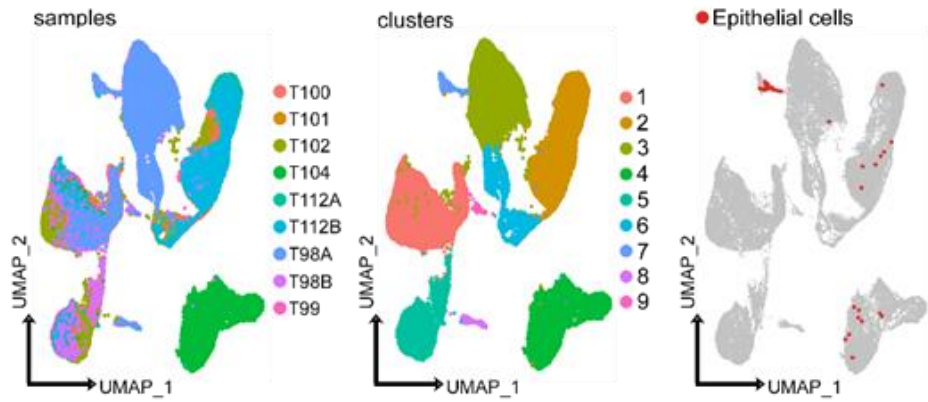

**Figure S7. Distribution of KRT14+ epithelial cells in MCC patient tumors. Related to STAR Methods.** Utilizing unintegrated tumor dataset, KRT14+ cells (highlighted as red dots) were identified by SingleR.

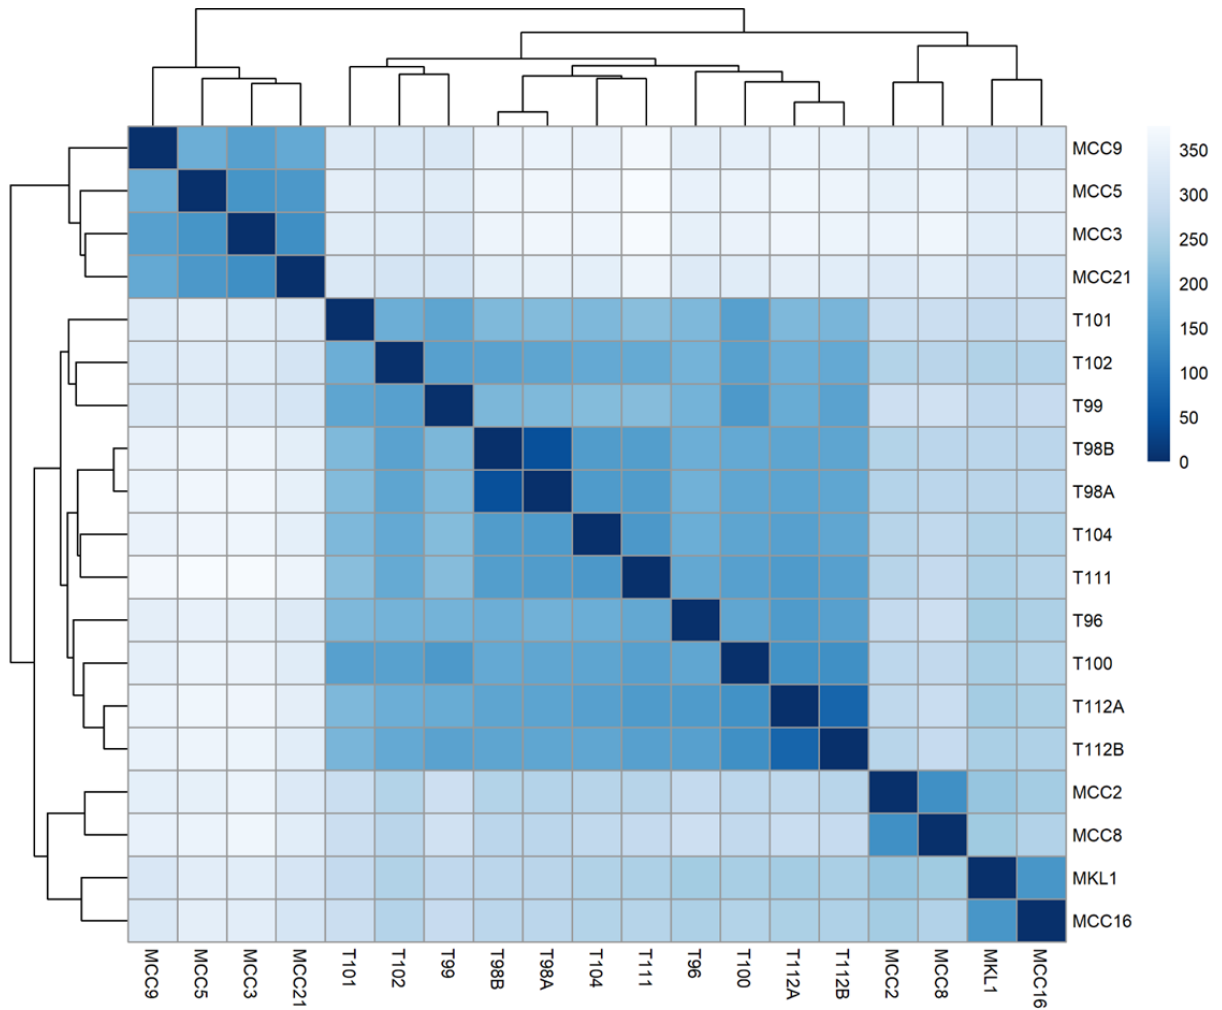

**Figure S8. A heatmap of sample-to-sample distance with hierarchical clustering between MCC patient tumors and MCC primary cell lines. Related to STAR Methods.** There is a lack of well-established algorithms for integrating bulk RNA-seq and pseudobulk on scRNA-seq datasets. A technically limited analysis depicting sample similarities was performed by coarsely combining the count matrix from of 8 MCC cell lines (bulk RNA-seq) and 11 patient tumors (pseudobulk on scRNA-seq) followed by normalization and distance calculation.

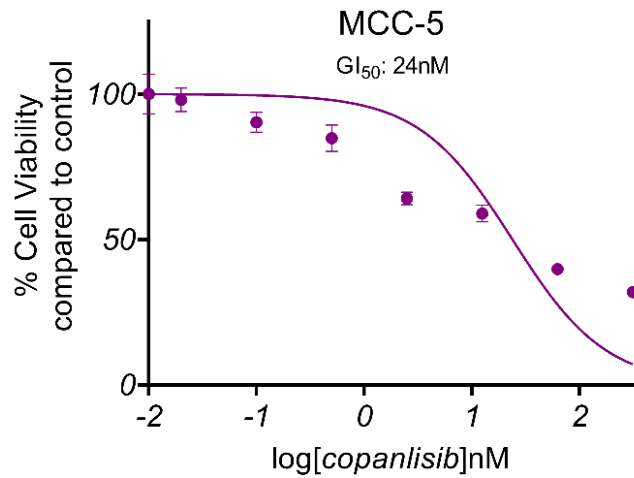

**Figure S9. Copanlisib sensitivity in MCC-5 cell line with ‘mesenchymal-like’ state. Related to STAR Methods and Figure 7.** MCC-5 cells were treated with serial concentrations of copanlisib for 72h, then assessed by CCK-8 colorimetric cell proliferation assay. Data presented as mean  $\pm$  SD for each dose,  $n = 6$  per dose, with half maximal growth inhibitory concentration (GI<sub>50</sub>) as analyzed by nonlinear regression model using GraphPad Prism.

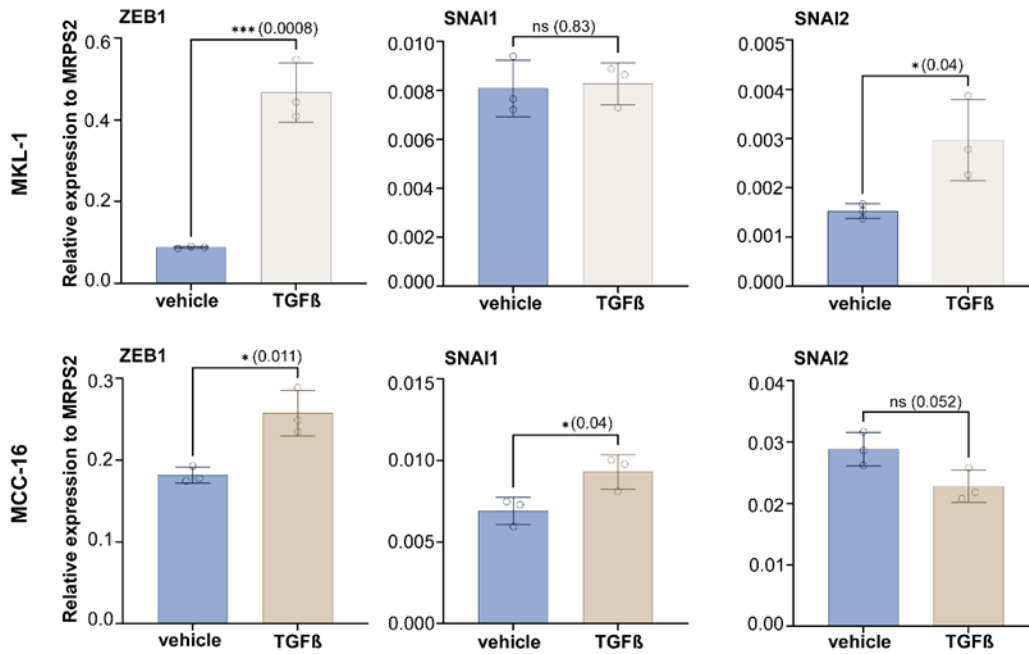

**Figure S10. Expression of EMT-TFs upon TGFβ treatment in MKL-1 and MCC-16 cells.** Related to Figure 7. MKL-1 and MCC-16 cells were treated with vehicle (DMSO) or 2ng/ml TGFβ for 24 hours, followed by qPCR. Data presented as mean ±SD, n=3. \*p < 0.05 \*\*\*p < 0.0005 as analyzed by unpaired Student's t-test.

**Supplementary Tables 1, 2, 5 and 7**

**Table S1. Summary of patient tumor samples and single cell RNA-seq analysis performed in this study. Related to STAR Methods, Figure 1, 2, and 3. (A) Patient demographics and tumor characteristics. (B) Summary of Library alignment to human (GRCh38) 2020-A. (C) Summary of each object analyzed in this study.**

**(A)**

| Sample | Tumor ID | Resected Tumor Location | Gender | Age | Race    | MCPyV status | Prior therapy |
|--------|----------|-------------------------|--------|-----|---------|--------------|---------------|
| 1      | T96      | Lymph node              | female | 70  | white   | positive     | pembrolizumab |
| 2      | T111     | Skin                    | male   | 72  | white   | negative     | pembrolizumab |
| 3      | T98A     | Skin                    | male   | 80  | white   | negative     | none          |
|        | T98B     | Lymph node              | male   | 80  | white   | negative     | none          |
| 4      | T99      | Lymph node              | male   | 51  | white   | positive     | none          |
| 5      | T100     | Skin                    | female | 56  | unknown | positive     | none          |
| 6      | T101     | Skin                    | male   | 80  | white   | positive     | none          |
| 7      | T102     | Lymph node              | male   | 74  | white   | negative     | none          |
| 8      | T104     | Parotid gland           | female | 77  | white   | negative     | none          |
| 9      | T112A    | Skin                    | female | 57  | white   | positive     | none          |
|        | T112B    | Lymph node              | female | 57  | white   | positive     | none          |

**(B)**

| Sample | Estimated number of cells | Mean Reads per cell | Median Genes per cell |
|--------|---------------------------|---------------------|-----------------------|
| T96    | 6978                      | 91728               | 3484                  |
| T98A   | 7573                      | 81745               | 4436                  |
| T98B   | 5589                      | 88191               | 4335                  |
| T99    | 5272                      | 98381               | 1545                  |
| T100   | 4157                      | 135101              | 3352                  |
| T101   | 2636                      | 218000              | 1930                  |
| T102   | 8161                      | 61443               | 1805                  |
| T104   | 8287                      | 67708               | 3340                  |
| T111   | 7318                      | 73905               | 4102                  |
| T112A  | 6036                      | 73022               | 3942                  |
| T112B  | 3537                      | 160895              | 2529                  |

(C)

| <b>Object</b>           | <b>Description</b>                      | <b>Number of cells</b> | <b>Mean Reads per cell</b> | <b>Mean Genes per cell</b> |
|-------------------------|-----------------------------------------|------------------------|----------------------------|----------------------------|
| Treatment-naïve object  | Contains all cell types from 9 samples  | 46027                  | 11015                      | 3181                       |
| Treatment-naïve Tumor   | Contains only tumor cells               | 22978                  | 13498                      | 3910                       |
| Treatment-naïve Immune  | Contains CD45+ cells                    | 12796                  | 5808                       | 1850                       |
| Treatment-naïve CD4CD8  | Contains CD4+/CD8+ cells                | 3169                   | 5398                       | 1806                       |
| Treatment-naïve B cells | Contains CD19+/CD20+ cells              | 2331                   | 5987                       | 1762                       |
| Naïve-ICI-R object      | Contains all cell types from 11 samples | 58936                  | 11555                      | 3304                       |
| Naïve-ICI-R Tumor       | Contains only tumor cells               | 35796                  | 14290                      | 4038                       |
| Naïve-ICI-R Immune      | Contains CD45+ cells                    | 14895                  | 5751                       | 1825                       |

**Table S2. Cancer-associated fibroblast (CAF), MESI-19 and SIG-14 gene list used in this study.**  
 Related to STAR Methods and Figure 1 and 5.

| #  | CAF gene list |
|----|---------------|
| 1  | COL1A1        |
| 2  | COL3A1        |
| 3  | FAP           |
| 4  | SPARC         |
| 5  | THY1          |
| 6  | DCN           |
| 7  | PDGFRB        |
| 8  | FBLN1         |
| 9  | S100A4        |
| 10 | ITGA5         |
| 11 | ACTA2         |
| 12 | COL5A2        |
| 13 | ADAM12        |
| 14 | COL6A3        |
| 15 | LRRRC15       |
| 16 | COL5A1        |
| 17 | COL1A2        |
| 18 | VCAN          |
| 19 | POSTN         |
| 20 | COL11A1       |
| 21 | THBS2         |
| 22 | LUM           |
| 23 | NTM           |
| 24 | AEBP1         |
| 25 | COL6A2        |
| 26 | PCOLCE        |
| 27 | GLT8D2        |
| 28 | ASPN          |
| 29 | BGN           |
| 30 | ISLR          |
| 31 | RARRES2       |
| 32 | TAGLN         |
| 33 | CTHRC1        |
| 34 | P4HA3         |
| 35 | GREM1         |
| 36 | MFAP5         |
| 37 | GAS1          |
| 38 | COMP          |
| 39 | EFEMP2        |

| #  | MESI-19 gene list |
|----|-------------------|
| 1  | CLEC2B            |
| 2  | CXCR4             |
| 3  | EMP3              |
| 4  | FLNA              |
| 5  | IFITM2            |
| 6  | IL32              |
| 7  | JUNB              |
| 8  | MYH9              |
| 9  | NR3C1             |
| 10 | PTPRC             |
| 11 | S100A11           |
| 12 | SAMSN1            |
| 13 | SRGN              |
| 14 | TIMP1             |
| 15 | TRIM56            |
| 16 | VIM               |
| 17 | WIPF1             |
| 18 | ZEB2              |
| 19 | ZYX               |

| #  | SIG-14 gene list |
|----|------------------|
| 1  | ISG15            |
| 2  | CD74             |
| 3  | ISG20            |
| 4  | IFI44L           |
| 5  | B2M              |
| 6  | BTG1             |
| 7  | HLA-DRA          |
| 8  | LTB              |
| 9  | RPL39            |
| 10 | IL7R             |
| 11 | CCR7             |
| 12 | EMP3             |
| 13 | CXCR4            |
| 14 | VIM              |

|    |         |
|----|---------|
| 40 | LOXL1   |
| 41 | MYL9    |
| 42 | COL8A2  |
| 43 | SGCD    |
| 44 | SCARF2  |
| 45 | TPM2    |
| 46 | SPOCK1  |
| 47 | HTRA1   |
| 48 | LGALS1  |
| 49 | ZEB1    |
| 50 | ZEB2    |
| 51 | COL6A1  |
| 52 | COL5A3  |
| 53 | INHBA   |
| 54 | COL12A1 |



**Table S5. MCC transcription factors identified by pySCENIC analysis. Related to STAR Methods.**

| MCCT_G1    |             | MCCT_G2   |             |
|------------|-------------|-----------|-------------|
| regulon    | Z-score     | regulon   | Z-score     |
| ALX1(+)    | 2.395458542 | TAF7(+)   | 0.312711282 |
| MEF2C(+)   | 2.150993916 | BARHL1(+) | 0.265176081 |
| ATOH8(+)   | 1.684436403 | HBP1(+)   | 0.256969399 |
| FOXO1(+)   | 1.419356562 | ZNF148(+) | 0.24670525  |
| ELF1(+)    | 1.335634403 | STAT1(+)  | 0.245591583 |
| IKZF1(+)   | 1.289873586 | MYC(+)    | 0.239314246 |
| RUNX3(+)   | 1.285482879 | TLX3(+)   | 0.236735923 |
| SPIB(+)    | 1.220197775 | IRF9(+)   | 0.235645606 |
| NEUROD1(+) | 1.217931933 | PSMD12(+) | 0.22530856  |
| STAT5A(+)  | 1.212667568 | YY1(+)    | 0.221973089 |
| ZEB1(+)    | 1.205305108 | MXI1(+)   | 0.213696911 |
| STAT6(+)   | 1.204616792 | HOXB4(+)  | 0.20653584  |
| IRF5(+)    | 1.1876485   | NFE2L2(+) | 0.20108852  |
| ELK3(+)    | 1.147263571 | LBX1(+)   | 0.195877766 |
| FLI1(+)    | 1.115508028 | MAX(+)    | 0.190698815 |
| MYOG(+)    | 1.107531862 | PRRX2(+)  | 0.184847361 |
| SPI1(+)    | 1.103700598 | RAX(+)    | 0.184618116 |
| SP5(+)     | 1.096817056 | FOXK1(+)  | 0.178893525 |
| IRF4(+)    | 1.091762814 | ARNTL(+)  | 0.171713951 |
| IRF2(+)    | 1.068457884 | FOXP2(+)  | 0.171684335 |
| IRF8(+)    | 1.037399378 | ZFX(+)    | 0.169753284 |
| HOXB2(+)   | 1.032348847 | THAP1(+)  | 0.169202894 |
| SP1(+)     | 1.019352929 | ATF2(+)   | 0.168495567 |
| CREM(+)    | 1.015311736 | IRF1(+)   | 0.16821169  |

**Table S7. TaqMan gene expression primers used for quantitative PCR analyses. Related to STAR Methods.**

| <b>Gene Symbol /</b> | <b>Source</b>     | <b>Assay ID</b> | <b>Cat #</b> |
|----------------------|-------------------|-----------------|--------------|
| MRPS2                | Life Technologies | Hs00211334_m1   | 4331182      |
| EMP3                 | Life Technologies | Hs00171319_m1   | 4331182      |
| S100A11              | Life Technologies | Hs01055944_g1   | 4331182      |
| VIM                  | Life Technologies | Hs00185584_m1   | 4331182      |
| KRT18                | Life Technologies | Hs02827483_g1   | 4331182      |
| KRT19                | Life Technologies | Hs00761767_s1   | 4331182      |
| KRT20                | Life Technologies | Hs00300643_m1   | 4331182      |
| CCL5                 | Life Technologies | Hs00982282_m1   | 4331182      |
| EPCAM                | Life Technologies | Hs00158980_m1   | 4331182      |
| SPINT2               | Life Technologies | Hs01070442_m1   | 4331182      |
| TWIST1               | Life Technologies | Hs04989912_s1   | 4331182      |
| TWIST2               | Life Technologies | Hs02379973_s1   | 4331182      |
| SNAI1                | Life Technologies | Hs00195591_m1   | 4331182      |
| SNAI2                | Life Technologies | Hs00161904_m1   | 4331182      |
| ZEB1                 | Life Technologies | Hs01566408_m1   | 4331182      |
| ZEB2                 | Life Technologies | Hs00207691_m1   | 4331182      |
